# Supplementary material
Source: PubMed Central journal article supplement (PMC3969266)

Figure S1\_Kim et al

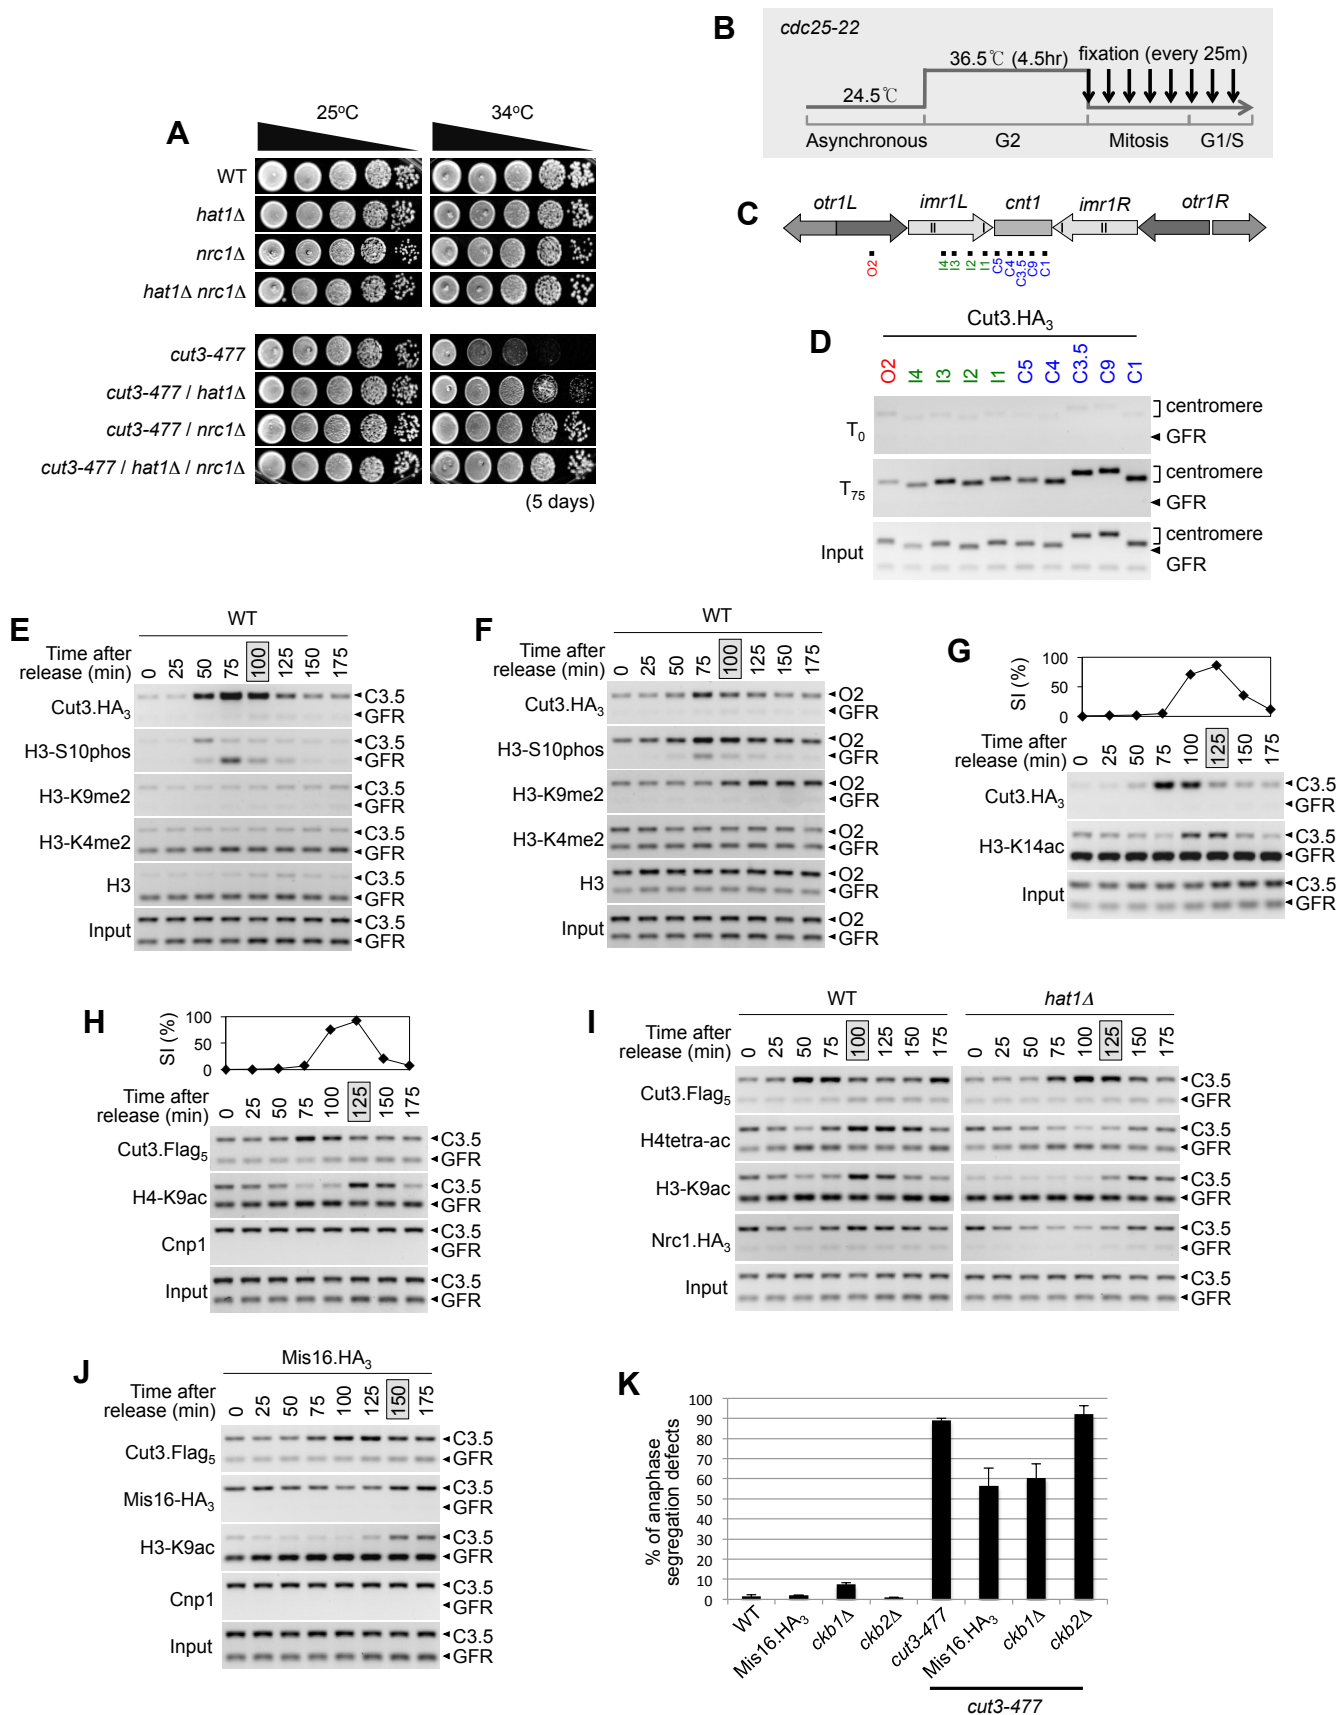

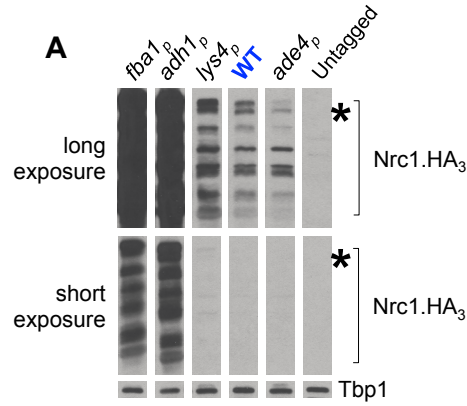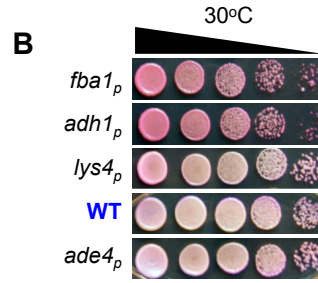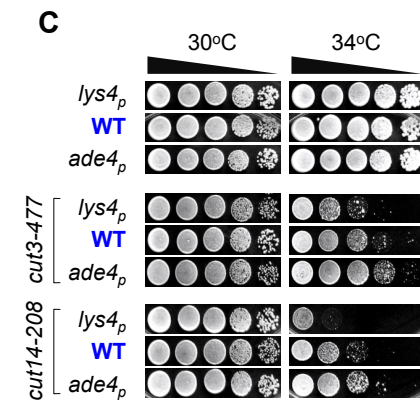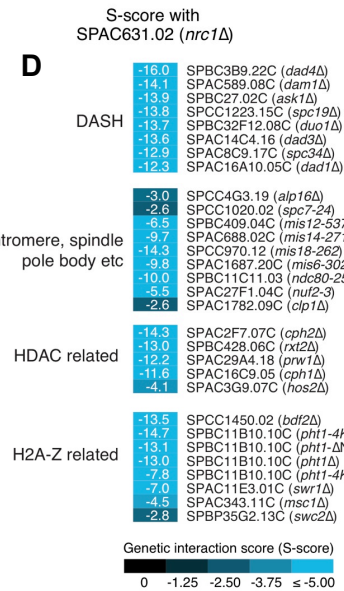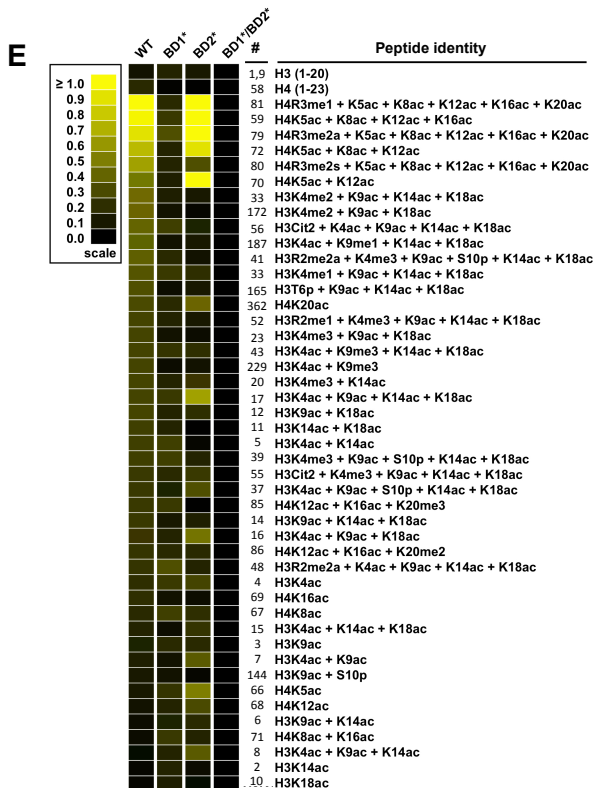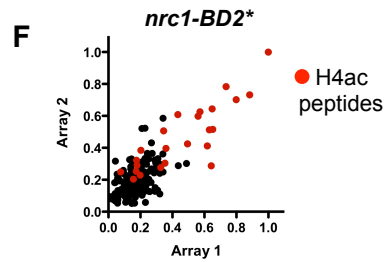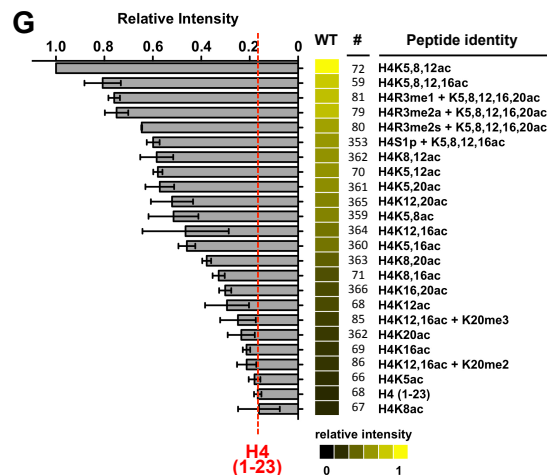

Figure S3\_Kim et al

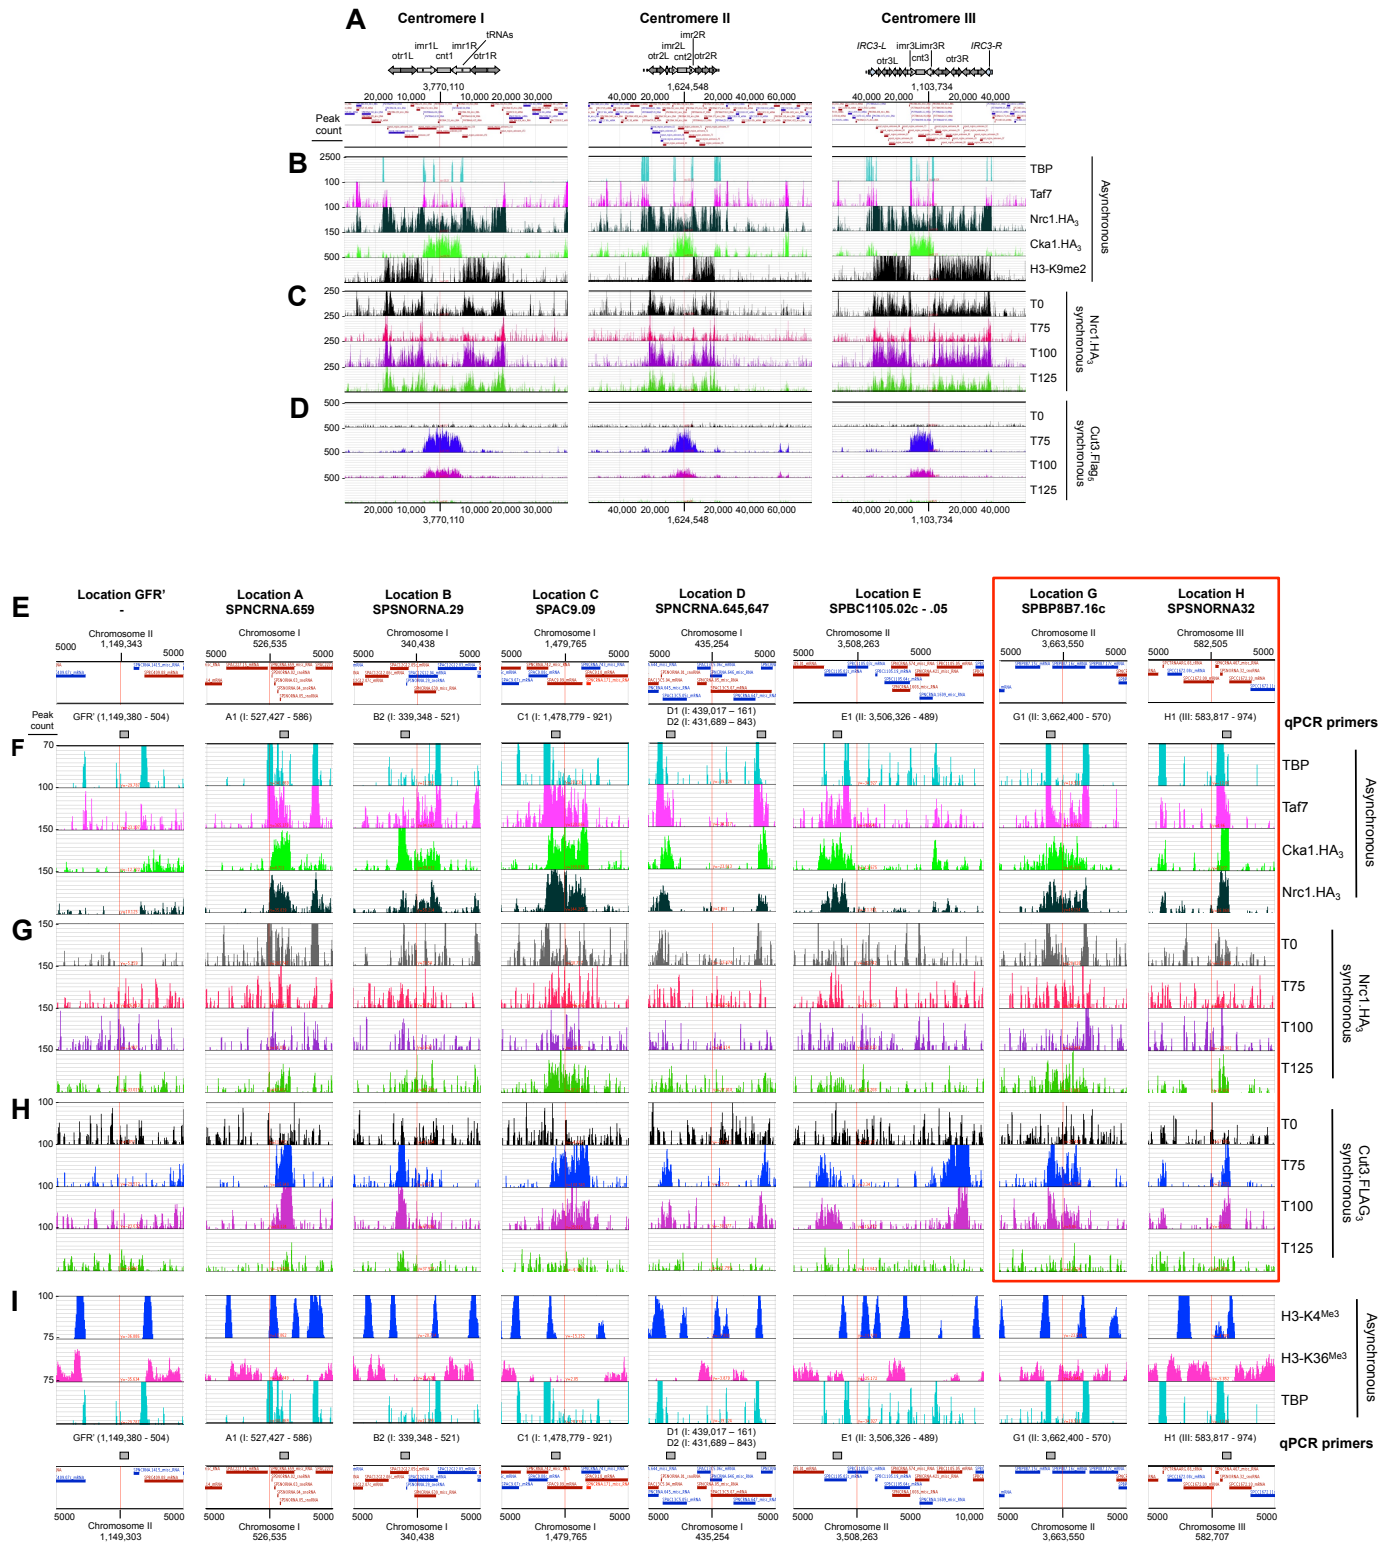

Figure S4\_Kim et al

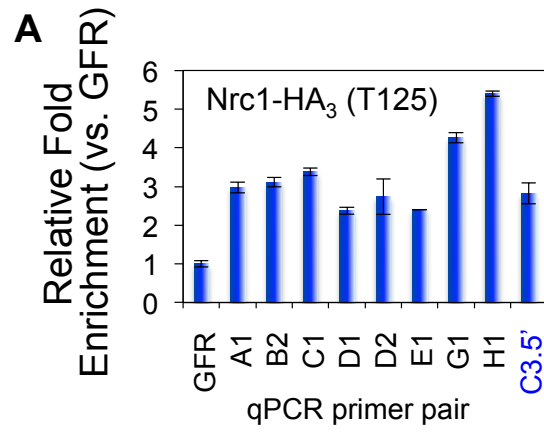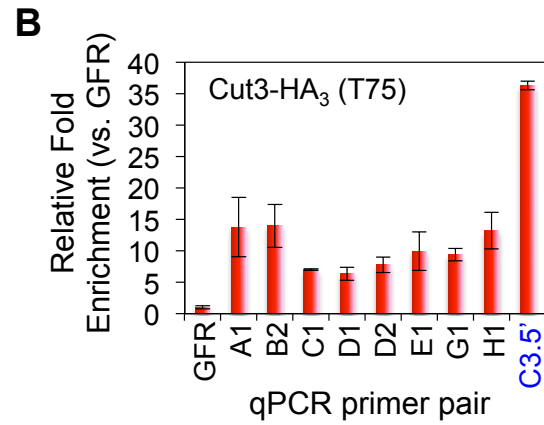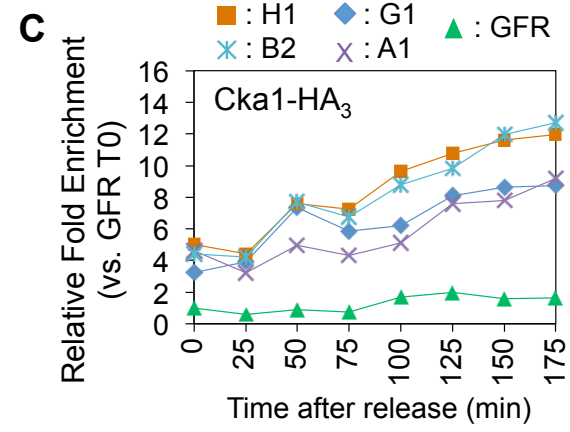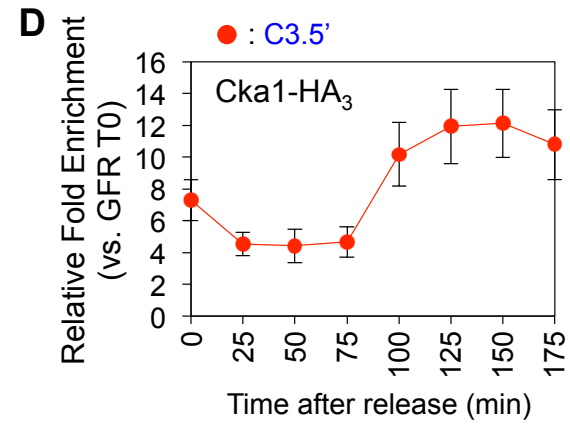

Figure S5\_Kim *et al*

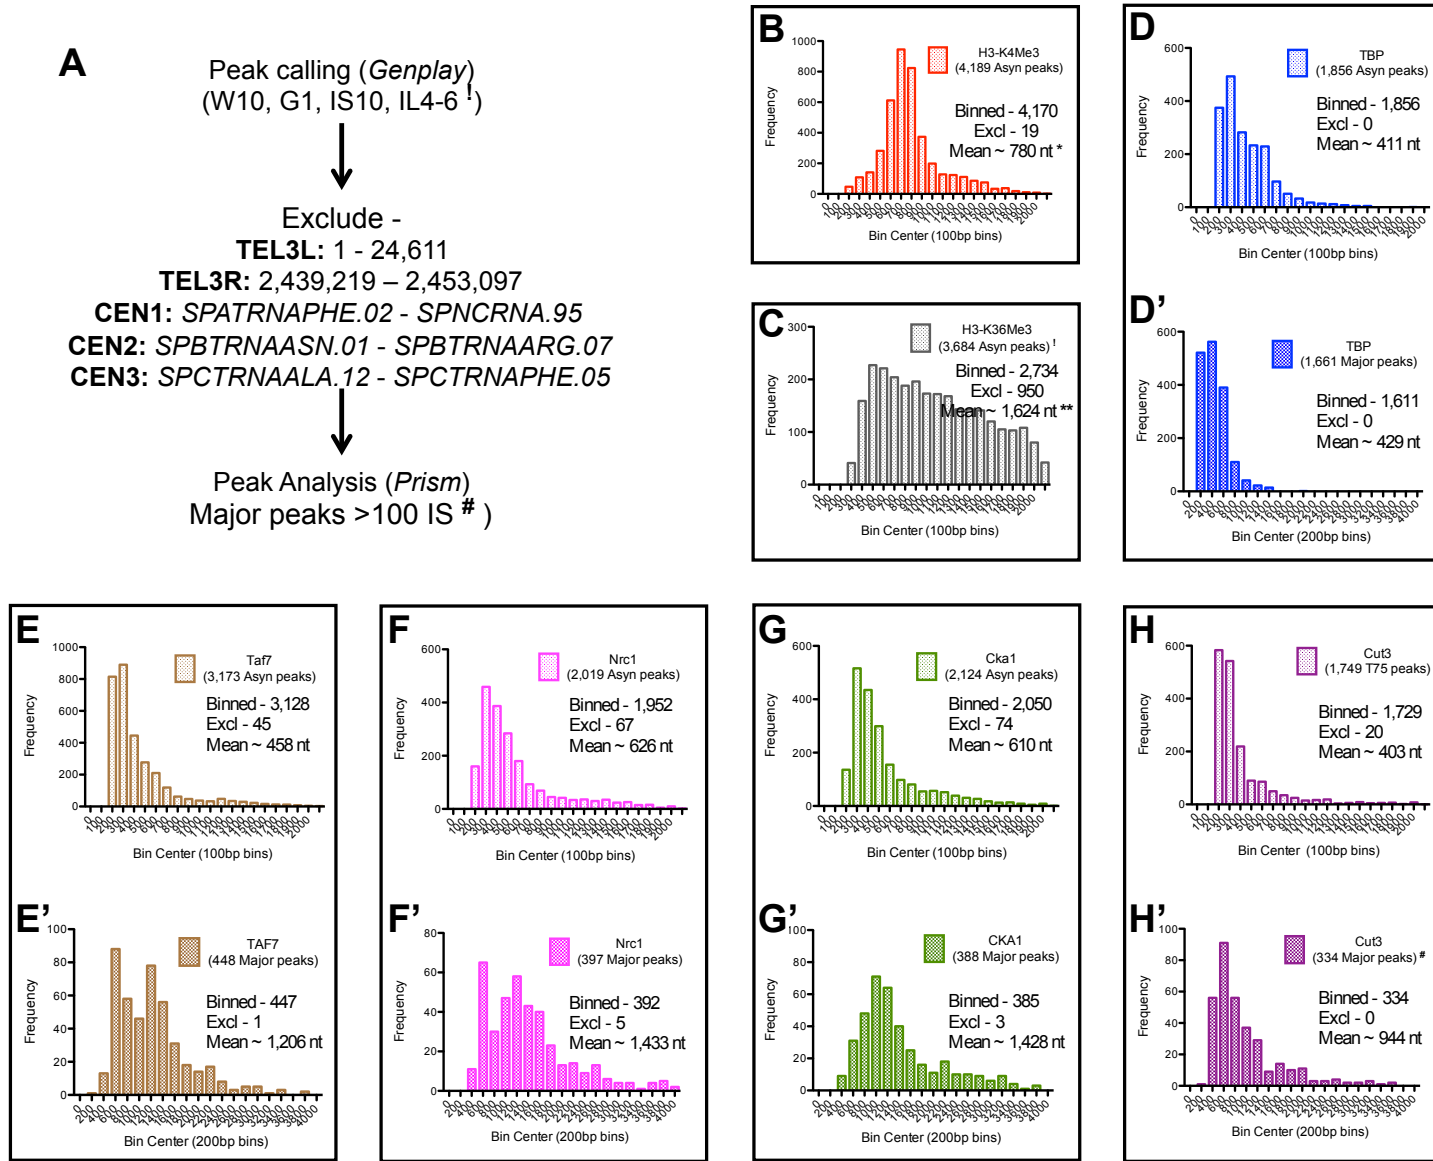

Figure S6\_Kim et al

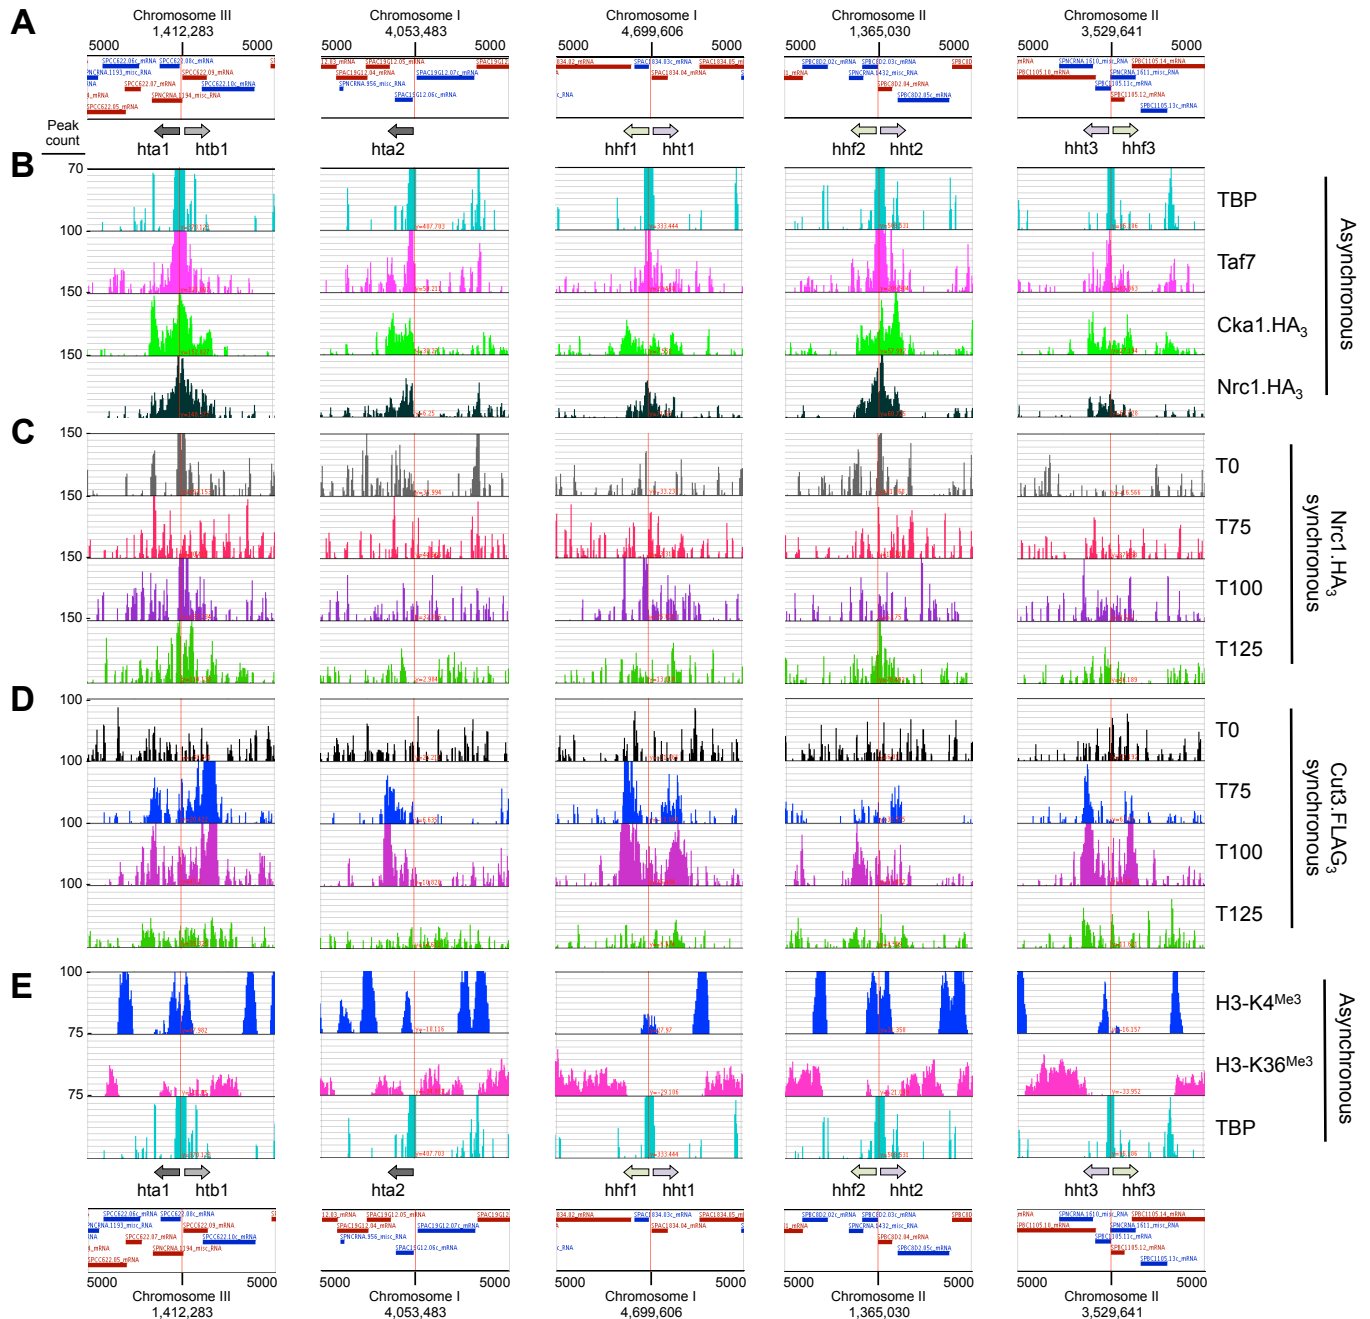

**Figure S7\_Kim et al**

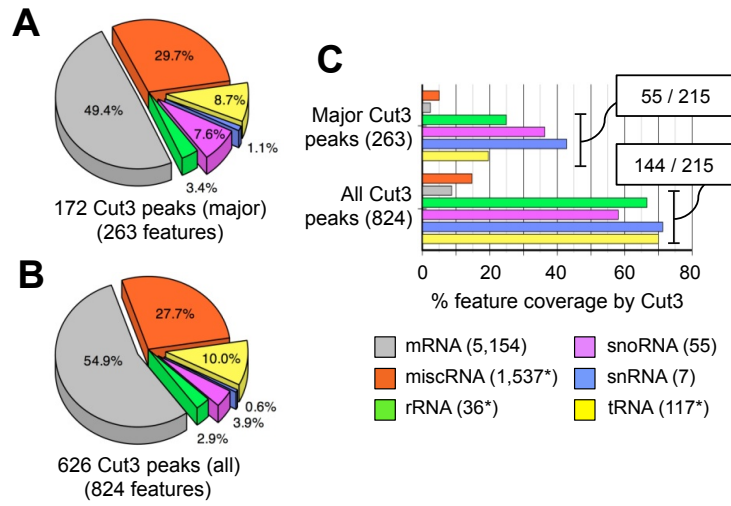

Supplement: NIHMS562165-supplement-02.pdf [file NIHMS562165-supplement-02.pdf]
