# Supplementary material
Source: PubMed Central journal article supplement (PMC3969266)
Supplement: NIHMS562165-supplement-01.pdf [file NIHMS562165-supplement-01.pdf]

## Identification of a BET family Bromodomain / Casein Kinase II / TAF-containing complex as a regulator of mitotic condensin function

Hyun-Soo Kim <sup>1</sup>, Rituparna Mukhopadhyay <sup>1,§</sup>, Scott B. Rothbart <sup>2,§</sup>, Andrea C. Silva <sup>1</sup>,  
 Vincent Vanoosthuyse <sup>3,¶</sup>, Ernest Radovani <sup>4</sup>, Thomas Kislinger <sup>5</sup>, Assen Roguev <sup>6,7</sup>,  
 Colm J. Ryan <sup>6,7,8</sup>, Jiewei Xu <sup>6,7</sup>, Harlizawati Jahari <sup>6,7,9</sup>, Kevin G. Hardwick <sup>3</sup>,  
 Jack F. Greenblatt <sup>10</sup>, Nevan J. Krogan <sup>6,7,11</sup>, Jeffrey S. Fillingham <sup>4</sup>, Brian D. Strahl <sup>2</sup>,  
 Eric E. Bouhassira <sup>1</sup>, Winfried Edelmann <sup>1</sup> & Michael-Christopher Keogh <sup>1,\*</sup>

<sup>1</sup> Dept. of Cell Biology, Albert Einstein College of Medicine, New York, NY 10454, USA

<sup>2</sup> Dept. of Biochemistry & Biophysics, UNC School of Medicine, Chapel Hill, NC 27599, USA

<sup>3</sup> Wellcome Trust Centre for Cell Biology, University of Edinburgh, Scotland EH9 3JR

<sup>4</sup> Dept. of Chemistry & Biology, Ryerson University, Toronto ON, M5B 2K3, Canada

<sup>5</sup> Princess Margaret Cancer Center, Toronto ON, M5G 1L7, Canada

<sup>6</sup> Dept. of Cellular & Molecular Pharmacology, UCSF, San Francisco, CA 94158, USA

<sup>7</sup> California Institute for Quantitative Biosciences, San Francisco, CA 94158, USA

<sup>8</sup> School of Medicine & Medical Science, University College Dublin, Ireland

<sup>9</sup> Malaysian Institute of Pharmaceuticals & Neutraceuticals, Malaysia

<sup>10</sup> Terrence Donnelly Centre for Cellular & Biomolecular Research,

University of Toronto, ON M5S 3E1, Canada

<sup>11</sup> J. David Gladstone Institutes, San Francisco, USA

§ Equal contribution

¶ Current address: Ecole Normale Supérieure de Lyon, 69364 Lyon Cedex 07, France

\* To whom correspondence should be addressed -

Email: michael.keogh@einstein.yu.edu

Tel: 718 430 8796 Fax: 718 430 8574

3 x Supplementary Tables (**Tables S1 - S3**)

7 x Supplementary Figures (**Figures S1 - S7**) + Legends

Supplementary References

**SUPPLEMENTARY TABLES**

**Table S1** Complex identification by sequential affinity purification / LC-MS

(A) *S. pombe* (*Sp*) Mis16 is found in two distinct complexes

(B) The NCT complex: proteins associated with *Sp* Nrc1 (*SPAC631.02*)

**Table S2** *ChIP-seq* peak classifications

**Table S3** Materials used in this study

(A) Antibodies

(B) Fission yeast strains

(C) Oligonucleotides

**Table S1:** Complex identification by sequential affinity purification / LC-MS**(A)** Mis16 is found in two distinct complexes (see **Figure 2E**)

| Protein | Gene name           | kD <sup>a</sup> | Notes                                           | Mis18<br>(KLP738) <sup>b</sup> | Mis16<br>(KLP22) <sup>b</sup> | Hat1<br>(KLP19) <sup>b</sup> |
|---------|---------------------|-----------------|-------------------------------------------------|--------------------------------|-------------------------------|------------------------------|
| Mis16   | <b>SPCC1672.10</b>  | 48              | 5 x WD repeats                                  | 7 (14) <sup>d</sup>            | 20 (45)                       | 16 (55)                      |
| Hat1    | <b>SPAC139.06</b>   | 44              | Acetyltransferase (Kat1, Hag603)                | -                              | 5 (10)                        | 9 (52)                       |
| Mis18   | <b>SPCC970.12</b>   | 22.5            | Mini-chromosome InStability                     | 8 (18)                         | 6 (9)                         | -                            |
| -       | <b>SPBC27B12.02</b> | 13              | Orphan (essential; mitochondrial <sup>c</sup> ) | 7 (16)                         | 3 (4)                         | -                            |
| -       | <b>SPBC776.16</b>   | 28.7            | Orphan (non-essential; SPB <sup>c</sup> )       | 10 (17)                        | 3 (4)                         | -                            |

**(B)** The NCT complex - proteins associated with *Sp* Nrc1 (*SPAC631.02*) (see **Figure 4A**)

| Protein                    | Gene Name           | kD <sup>a</sup> | Peptides              | Previous complexes | NOTES                                                    |
|----------------------------|---------------------|-----------------|-----------------------|--------------------|----------------------------------------------------------|
| Nrc1 (KLP219) <sup>b</sup> | <b>SPAC631.02</b>   | 84              | 38 (127) <sup>d</sup> | -                  | Tandem bromodomain. Non-essential                        |
| Cka1                       | <b>SPAC23C11.11</b> | 40              | 15 (28)               | CKII               | Catalytic subunit ( $\alpha$ ). Essential                |
| Ckb2                       | <b>SPBC2G5.02c</b>  | 29              | 4 (5)                 | CKII               | Regulatory subunit ( $\beta$ , predicted). Non-essential |
| Ckb1                       | <b>SPAC1851.03</b>  | 27              | 3 (4)                 | CKII               | Regulatory subunit ( $\beta$ ). Non-essential            |
| Taf1, Taf111               | <b>SPAC2G11.14</b>  | 111             | 13 (15)               | TFIID              | ZnF (CCHC type). Essential. Antibody available.          |
| Taf7, Ptr6                 | <b>SPAC13F5.02c</b> | 45              | 4 (4)                 | TFIID              | Essential. Antibody available.                           |
| Taf4                       | <b>SPAC23G3.09</b>  | 41              | 3 (4)                 | TFIID              | Histone fold. Essential                                  |
| Taf5, Taf51, Taf73         | <b>SPBC15D4.14</b>  | 72              | 3 (4)                 | TFIID              | 6 x WD repeats; LisH dimerization motif. Essential       |
| Taf6, Taf50                | <b>SPCC16C4.18c</b> | 50              | 2 (2)                 | TFIID, SAGA        | Histone-fold (H4-like). Essential                        |

**KEY:** Genes (Mis16, Hat1, Mis18 or Nrc1 (SPAC631.02)) were C-terminally tagged with TAP (CBP-2xProtA) and associated factors identified by sequential affinity purification / LC-MS (Kim et al., 2009; Silva et al., 2012) from the relevant fission yeast strains (see **Table S3**). Peptide identifications were accepted if they could be established at > 95.0% probability by the *Peptide Prophet* algorithm. Protein identifications were accepted if they could be established at > 95.0% probability and contained at least two identified peptides. Specifically enriched proteins and common contaminants were distinguished by comparison with our > 50 *Sp* TAP-purifications performed to date. Indicated proteins were identified in multiple preparations (representative run shown).

- <sup>a</sup> Protein sizes (kD) are predicted by amino-acid composition (*PomBase*) and not determined experimentally
- <sup>a</sup> BAIT is shaded (strain genotypes are provided in **Table S3**)
- <sup>c</sup> *nmt1<sub>pr</sub>* :: *yfg*<sup>+</sup> :: *YFP* fusions (Matsuyama et al., 2006)
- <sup>d</sup> Unique peptides (total peptides)

**Table S2: ChIP-seq peak classifications (related to Figures 4 - 6, S3 & S5 - S7)**

|                                  | Nrc1 (As)<br>TEL3- <sup>a</sup> | Nrc1 (As)<br>TEL3-<br>CEN- <sup>b</sup> | Cka1 (As)<br>TEL3- | Cka1 (As)<br>TEL3-<br>CEN- | Taf7 (As)<br>TEL3- | Taf7 (As)<br>TEL3-<br>CEN- | Cut3 (Me)<br>TEL3- | Cut3 (Me)<br>TEL3-<br>CEN- |
|----------------------------------|---------------------------------|-----------------------------------------|--------------------|----------------------------|--------------------|----------------------------|--------------------|----------------------------|
| <b>Total Peaks</b>               | 2,107                           | 2,029                                   | 2,159              | 2,127                      | 3,223              | 3,184                      | 1,829              | 1,759                      |
| <b>Peak IS - Min</b>             | 10                              | 10                                      | 10                 | 10                         | 10                 | 10                         | 10                 | 10                         |
| <b>Peak IS - Max</b>             | 26,562                          | 6,758                                   | 121,770            | 29,970                     | 33,928             | 33,938                     | 37,342             | 5,298                      |
| <b>Peak IS - Median</b>          | 19.3                            | 21.6                                    | 18.5               | 18.3                       | 20.5               | 20.5                       | 32.5               | 32.2                       |
| <b>Peak IS - Average</b>         | 193.3                           | 134.9                                   | 220.8              | 152                        | 381.4              | 376.7                      | 108.7              | 55.5                       |
| <b>IS 10 - 100</b>               | 1,665                           | 1,632                                   | 1,823              | 1,741                      | 2,766              | 2,739                      | 1,473 <sup>c</sup> | 1,425 <sup>c</sup>         |
| <b>Major peaks<sup>c</sup> -</b> |                                 |                                         |                    |                            |                    |                            |                    |                            |
| <b>IS 100 - 1,000</b>            | 357                             | 333                                     | 336                | 325                        | 245                | 236                        | 336 <sup>c</sup>   | 317 <sup>c</sup>           |
| <b>IS 1,000 - 10,000</b>         | 81                              | 64                                      | 64                 | 59                         | 188                | 187                        | 16 <sup>c</sup>    | 16 <sup>c</sup>            |
| <b>IS &gt; 10,000</b>            | 4                               | 0                                       | 3                  | 2                          | 24                 | 22                         | 4 <sup>c</sup>     | 1 <sup>c</sup>             |
| <b>MAJOR PEAKS</b>               | <b>442</b>                      | <b>397 (19.5%)</b>                      | <b>403</b>         | <b>386 (18.1%)</b>         | <b>457</b>         | <b>445 (13.9%)</b>         | <b>356</b>         | <b>334 (19%)</b>           |

ChIP-seq data (from Asynchronous or Metaphase samples) was loaded into *Genplay* (Lajugie and Bouhassira, 2011) as individual tracks (50 bp windows; normalized and INPUT subtracted) relative to the annotated *Sp* genome (Sanger Center release *pombe090511*). The online version of this paper links to a *Genplay* project to provide a dynamic visualization of each track. Peaks for comparison and assignment to genomic features were automatically identified / quantified by optimized parameters: Regions of 10 successive Windows; Gap permitted, 1 window; **Threshold Island Score (IS)**, 10; Minimum Island Length, 4 windows (see **Experimental Procedures**). After cleanup the range and distribution of island scores was used to identify Major peaks (> 50, Cut3; or > 100, all others) for certain analyses (e.g. **Figure 5A-F**). All sample data have been deposited in NCBI's Gene Expression Omnibus (Edgar et al., 2002) and are accessible through GEO series accession number GSE53955.

<sup>a</sup> Peaks at the Chromosome 3 telomeres (*TEL-3L*, 1 - 24,611; *TEL-3R*, 2,439,219 - 2,453,097: together includes 11 rRNAs and 3 misc RNAs) were excluded from all consideration because of repeat issues.

- b Peaks at the centromeres (*CEN1*, *SPATRNPHE.02* - *SPNCRNA.95*; *CEN2*, *SPBTRNAASN.01* - *SPBTRNAARG.07*; *CEN3*, *SPCTRNAALA.12* - *SPCTRNPHE.05*: together includes 54 tRNAs and 31 misc RNAs) were considered separately because of the special epigenetic signature and behavior at these locations.
- c Major peaks for Cut3 are divided into IS [50 - 500], [500 - 5,000] and > 5,000 (shaded).

**Table S3:** Materials used in this study**(A)** Antibodies

| <b>Anti-</b>                        | <b>Species</b> | <b>Info</b> | <b>Sera #</b> | <b>Source</b>                              |
|-------------------------------------|----------------|-------------|---------------|--------------------------------------------|
| Histone H3                          | Rabbit         | Polyclonal  | ab1791        | Abcam                                      |
| Histone H3-K9ac                     | Rabbit         | Polyclonal  | 07-352        | Millipore                                  |
| Histone H3-K14ac                    | Rabbit         | Polyclonal  | 07-353        | Millipore                                  |
| Histone H3-K18ac                    | Rabbit         | Polyclonal  | 39129         | Active Motif                               |
| Histone H4-K5ac                     | Rabbit         | Polyclonal  | 39169         | Active Motif                               |
| Histone H4-K12ac                    | Rabbit         | Polyclonal  | 39165         | Active Motif                               |
| Histone H4 tetra-ac                 | Rabbit         | Polyclonal  | 39179         | Active Motif                               |
| Histone H3-K4me3                    | Rabbit         | Polyclonal  | Ab8678        | Marc Bedford                               |
| Histone H3-K36me3                   | Rabbit         | Polyclonal  | Ab9050        | Abcam                                      |
| Histone H3-K9me2                    | Rabbit         | Polyclonal  | 39137         | Active Motif                               |
| Histone H3-S10phos                  | Mouse          | Monoclonal  | 06-816        | Millipore                                  |
| HA epitope tag                      | Mouse          | Monoclonal  | 12CA5         | -                                          |
| FLAG M2                             | Rabbit         | Polyclonal  | 5407          | Alexa Fluor 488 Conjugate; Cell Signalling |
| FLAG M2                             | Mouse          | Monoclonal  | A2220         | Affinity Gel; Sigma-Aldrich                |
| <i>Sp</i> Cnp1 (SPBC1105.17)        | Sheep          | Polyclonal  | -             | Robin Allshire (Caterino and Hayes, 2007)  |
| <i>Sp</i> Tbp1 (SPAC29E6.08)        | Rabbit         | Polyclonal  | -             | Rich Maraia (Huang et al., 2000)           |
| <i>Sp</i> Taf7 (ptr6, SPAC13F5.02c) | Rabbit         | Polyclonal  | RTK7-8        | Tetsuro Kokubo (Mitsuzawa et al., 2001)    |
| <i>T. brucei</i> $\alpha$ -Tubulin  | Mouse          | Monoclonal  | Tat1          | Keith Gull (Woods et al., 1989)            |

## (B) Fission yeast strains

| Name      | Alt. name                                                                           | Genotype                                                                                                                      | Used                                                    | Source    |
|-----------|-------------------------------------------------------------------------------------|-------------------------------------------------------------------------------------------------------------------------------|---------------------------------------------------------|-----------|
| KLP377    |                                                                                     | <i>h<sup>-</sup> ade6-M210 ura4-D18 leu1-32 smt-0 mat1_m-syh<sup>S</sup> rpl42::cyh<sup>R</sup> (sP56Q) cut3-477::NatMX6</i>  | Figure 1                                                | This work |
| KLP378    |                                                                                     | <i>h<sup>-</sup> ade6-M210 ura4-D18 leu1-32 smt-0 mat1_m-syh<sup>S</sup> rpl42::cyh<sup>R</sup> (sP56Q) cut14-208::NatMX6</i> | Figure 1                                                | This work |
| KFP26     | KGY425, AP26                                                                        | <i>h<sup>-</sup> ade6-M210 ura4-D18 leu1-32 his3-D1</i>                                                                       | Figures 1, S1                                           | K.L Gould |
| KLP684    |                                                                                     | <i>h<sup>-</sup> ade6-M210 ura4-D18 leu1-32 his3-D1 hat1Δ::KanMX6</i>                                                         | Figures 1, S1                                           | This work |
| KLP686    |                                                                                     | <i>h<sup>-</sup> ade6-M210 ura4-D18 leu1-32 his3-D1 nrc1Δ::KanMX6</i>                                                         | Figures 1, S1                                           | This work |
| KLP402    |                                                                                     | <i>h<sup>+</sup> ade6-M216 ura4-D18 leu1-32 his3-D1 cut3-477::NatMX6</i>                                                      | Figures 1, S1                                           | This work |
| KLP712    |                                                                                     | <i>h<sup>?</sup> ade6-M2XX ura4-D18 leu1-32 his3-D1 cut3-477::NatMX6 hat1Δ::KanMX6</i>                                        | Figures 1, S1                                           | This work |
| KLP714    |                                                                                     | <i>h<sup>?</sup> ade6-M2XX ura4-D18 leu1-32 his3-D1 cut3-477::NatMX6 nrc1Δ::KanMX6</i>                                        | Figures 1, S1                                           | This work |
| KLP416    |                                                                                     | <i>h<sup>+</sup> ade6-M216 ura4-D18 leu1-32 his3-D1 cut14-208::NatMX6</i>                                                     | Figure 1                                                | This work |
| KLP713    |                                                                                     | <i>h<sup>?</sup> ade6-M2XX ura4-D18 leu1-32 his3-D1 cut14-208::NatMX6 hat1Δ::KanMX6</i>                                       | Figure 1                                                | This work |
| KLP715    |                                                                                     | <i>h<sup>?</sup> ade6-M2XX ura4-D18 leu1-32 his3-D1 cut14-208::NatMX6 nrc1Δ::KanMX6</i>                                       | Figure 1                                                | This work |
| KFP445    |                                                                                     | <i>h<sup>-</sup> leu1-32 cnd2-1</i>                                                                                           | Figure 1                                                | This work |
| KLP767    |                                                                                     | <i>h<sup>?</sup> leu1-32 cnd2-1 hat1Δ::KanMX6</i>                                                                             | Figure 1                                                | This work |
| KLP768    |                                                                                     | <i>h<sup>?</sup> leu1-32 cnd2-1 nrc1Δ::KanMX6</i>                                                                             | Figure 1                                                | This work |
| HSK107    |                                                                                     | <i>h<sup>-</sup> ade6-M210 ura4-D18 leu1-32 his3-D1 nrc1Δ::KanMX6 hat1Δ::HphMX6</i>                                           | Figure S1                                               | This work |
| HSK109    |                                                                                     | <i>h<sup>?</sup> ade6-M2XX ura4-D18 leu1-32 his3-D1 cut3-477::NatMX6 nrc1Δ::KanMX6 hat1Δ::HphMX6</i>                          | Figure S1                                               | This work |
| KFP273    |                                                                                     | <i>h<sup>-</sup> ura4-D18 leu1-32 nda3-KM311</i>                                                                              | Figure 2                                                | P. Nurse  |
| KLP303    |                                                                                     | <i>h<sup>+</sup> ade6-M216 ura4-D18 leu1-32 his3-D1 Cut3.HA<sub>3</sub>::KanMX6</i>                                           | Figure 2                                                | This work |
| 2011Spd-5 |                                                                                     | <i>h<sup>+</sup> ade6-M21X ura4-D18 leu1-32</i>                                                                               | Figure 2                                                | Bioneer   |
| 2011Spd-3 |                                                                                     | <i>h<sup>+</sup> ade6-M21X ura4-D18 leu1-32 rtt109Δ::KanMX6</i>                                                               | Figure 2                                                | Bioneer   |
| 2011Spd-4 |                                                                                     | <i>h<sup>+</sup> ade6-M21X ura4-D18 leu1-32 hat1Δ::KanMX6</i>                                                                 | Figure 2                                                | Bioneer   |
| 2011Spd-1 |                                                                                     | <i>h<sup>+</sup> ade6-M21X ura4-D18 leu1-32 gcn5Δ::KanMX6</i>                                                                 | Figure 2                                                | Bioneer   |
| KLP346    |                                                                                     | <i>h<sup>?</sup> cdc25-22 Cut3.HA<sub>3</sub>::KanMX6</i>                                                                     | Figures 2, S1, S4                                       | This work |
| KLP694    |                                                                                     | <i>h<sup>?</sup> cdc25-22 Cut3.Flag<sub>5</sub>::HphMX6 Nrc1.HA<sub>3</sub>::KanMX6</i>                                       | Figures 2, S1                                           | This work |
| KLP698    |                                                                                     | <i>h<sup>?</sup> cdc25-22 Cut3.Flag<sub>5</sub>::HphMX6 Nrc1.HA<sub>3</sub>::KanMX6 hat1Δ::NatMX6</i>                         | Figures 2, S1                                           | This work |
| KLP662    |                                                                                     | <i>h<sup>-</sup> ade6-M210 ura4-D18 leu1-32 his3-D1 Mis16.HA<sub>3</sub>::KanMX6</i>                                          | Figures 2, S1                                           | This work |
| KLP795    |                                                                                     | <i>h<sup>-</sup> ade6-M210 ura4-D18 leu1-32 his3-D1 Mis16.HA<sub>3</sub>::KanMX6 Hat1.Flag<sub>5</sub>::HphMX6</i>            | Figure 2                                                | This work |
| KLP671    |                                                                                     | <i>h<sup>?</sup> cdc25-22 Cut3.Flag<sub>5</sub>::HphMX6</i>                                                                   | Figures 2, S1                                           | This work |
| KLP672    |                                                                                     | <i>h<sup>?</sup> cdc25-22 Cut3.Flag<sub>5</sub>::HphMX6 Mis16.HA<sub>3</sub>::KanMX6</i>                                      | Figures 2, S1                                           | This work |
| KFP26     | KGY425, AP26                                                                        | <i>h<sup>-</sup> ade6-M210 ura4-D18 leu1-32 his3-D1</i>                                                                       | Figure 1                                                | K.L Gould |
| KLP402    |                                                                                     | <i>h<sup>+</sup> ade6-M216 ura4-D18 leu1-32 his3-D1 cut3-477::NatMX6</i>                                                      | Figures 2, S1                                           | This work |
| KLP716    |                                                                                     | <i>h<sup>?</sup> ade6-M2XX ura4-D18 leu1-32 his3-D1 cut3-477::NatMX6 Mis16.HA<sub>3</sub>::KanMX6</i>                         | Figures 2, S1                                           | This work |
| KLP416    |                                                                                     | <i>h<sup>+</sup> ade6-M216 ura4-D18 leu1-32 his3-D1 cut14-208::NatMX6</i>                                                     | Figure 1                                                | This work |
| KLP717    |                                                                                     | <i>h<sup>?</sup> ade6-M2XX ura4-D18 leu1-32 his3-D1 cut14-208::NatMX6 Mis16.HA<sub>3</sub>::KanMX6</i>                        | Figure 2                                                | This work |
| KFP26     |                                                                                     | KGY425, AP26                                                                                                                  | <i>h<sup>-</sup> ade6-M210 ura4-D18 leu1-32 his3-D1</i> | Figure 3  |
| KLP689    | <i>h<sup>-</sup> ade6-M210 ura4-D18 leu1-32 his3-D1 Nrc1.HA<sub>3</sub>::KanMX6</i> |                                                                                                                               | Figure 3                                                | This work |



| Name   | Alt. name    | Genotype                                                                                                                      | Used                     | Source    |
|--------|--------------|-------------------------------------------------------------------------------------------------------------------------------|--------------------------|-----------|
| KLP741 |              | <i>h<sup>-</sup> ade6-M210 ura4-D18 leu1-32 his3-D1 nrc1-BD1*.HA<sub>3</sub>::KanMX6</i>                                      | Figure 3                 | This work |
| KLP742 |              | <i>h<sup>-</sup> ade6-M210 ura4-D18 leu1-32 his3-D1 nrc1-BD2*.HA<sub>3</sub>::KanMX6</i>                                      | Figure 3                 | This work |
| KLP740 |              | <i>h<sup>-</sup> ade6-M210 ura4-D18 leu1-32 his3-D1 nrc1-BD1*/BD2*.HA<sub>3</sub>::KanMX6</i>                                 | Figure 3                 | This work |
| KLP694 |              | <i>h<sup>?</sup> cdc25-22 cut3.Flag<sub>5</sub>::HphMX6 Nrc1.HA<sub>3</sub>::KanMX6</i>                                       | Figure 3                 | This work |
| KLP759 |              | <i>h<sup>?</sup> cdc25-22 cut3.Flag<sub>5</sub>::HphMX6 nrc1-BD1*/BD2*.HA<sub>3</sub>::KanMX6</i>                             | Figure 3                 | This work |
| KLP686 |              | <i>h<sup>-</sup> ade6-M210 ura4-D18 leu1-32 his3-D1 nrc1Δ::KanMX6</i>                                                         | Figure 3                 | This work |
| KLP402 |              | <i>h<sup>+</sup> ade6-M216 ura4-D18 leu1-32 his3-D1 cut3-477::NatMX6</i>                                                      | Figure 3                 | This work |
| KLP714 |              | <i>h<sup>?</sup> ade6-M2XX ura4-D18 leu1-32 his3-D1 cut3-477::NatMX6 nrc1Δ::KanMX6</i>                                        | Figure 3                 | This work |
| KLP769 |              | <i>h<sup>?</sup> ade6-M2XX ura4-D18 leu1-32 his3-D1 cut3-477::NatMX6 Nrc1.HA<sub>3</sub>::KanMX6</i>                          | Figure 3                 | This work |
| KLP773 |              | <i>h<sup>?</sup> ade6-M2XX ura4-D18 leu1-32 his3-D1 cut3-477::NatMX6 nrc1-BD1*.HA<sub>3</sub>::KanMX6</i>                     | Figure 3                 | This work |
| KLP775 |              | <i>h<sup>?</sup> ade6-M2XX ura4-D18 leu1-32 his3-D1 cut3-477::NatMX6 nrc1-BD2*.HA<sub>3</sub>::KanMX6</i>                     | Figure 3                 | This work |
| KLP771 |              | <i>h<sup>?</sup> ade6-M2XX ura4-D18 leu1-32 his3-D1 cut3-477::NatMX6 nrc1-BD1*/BD2*.HA<sub>3</sub>::KanMX6</i>                | Figure 3                 | This work |
| KLP689 |              | <i>h<sup>-</sup> ade6-M210 ura4-D18 leu1-32 his3-D1 Nrc1.HA<sub>3</sub>::KanMX6</i>                                           | Figures 4-6, S3, S5-6    | This work |
| KLP797 |              | <i>h<sup>-</sup> ade6-M210 ura4-D18 leu1-32 his3-D1 Cka1.Flag<sub>5</sub>::HphMX6</i>                                         | Figure 4                 | This work |
| KLP800 |              | <i>h<sup>-</sup> ade6-M210 ura4-D18 leu1-32 his3-D1 Nrc1.HA<sub>3</sub>::KanMX6 Cka1.Flag<sub>5</sub>::HphMX6</i>             | Figure 4                 | This work |
| KLP802 |              | <i>h<sup>-</sup> ade6-M210 ura4-D18 leu1-32 his3-D1 nrc1-BD1*.HA<sub>3</sub>::KanMX6 Cka1.Flag<sub>5</sub>::HphMX6</i>        | Figure 4                 | This work |
| KLP803 |              | <i>h<sup>-</sup> ade6-M210 ura4-D18 leu1-32 his3-D1 nrc1-BD2*.HA<sub>3</sub>::KanMX6 Cka1.Flag<sub>5</sub>::HphMX6</i>        | Figure 4                 | This work |
| KFP26  | KGY425, AP26 | <i>h<sup>-</sup> ade6-M210 ura4-D18 leu1-32 his3-D1</i>                                                                       | Figures 4, S3, S5        | K.L Gould |
| KLP707 |              | <i>h<sup>-</sup> ade6-M210 ura4-D18 leu1-32 his3-D1 ckb1Δ::KanMX6</i>                                                         | Figures 4, S1            | This work |
| KLP709 |              | <i>h<sup>-</sup> ade6-M210 ura4-D18 leu1-32 his3-D1 ckb2Δ::KanMX6</i>                                                         | Figures 4, S1            | This work |
| KLP402 |              | <i>h<sup>+</sup> ade6-M216 ura4-D18 leu1-32 his3-D1 cut3-477::NatMX6</i>                                                      | Figures 4, S1            | This work |
| KLP743 |              | <i>h<sup>?</sup> ade6-M2XX ura4-D18 leu1-32 his3-D1 cut3-477::NatMX6 ckb1Δ::KanMX6</i>                                        | Figures 4, S1            | This work |
| KLP745 |              | <i>h<sup>?</sup> ade6-M2XX ura4-D18 leu1-32 his3-D1 cut3-477::NatMX6 ckb2Δ::KanMX6</i>                                        | Figures 4, S1            | This work |
| KLP722 |              | <i>h<sup>?</sup> cdc25-22 Cut3.Flag<sub>5</sub>::HphMX6 Cka1.HA<sub>3</sub>::KanMX6</i>                                       | Figures 4, 6, S4         | This work |
| KLP725 |              | <i>h<sup>?</sup> cdc25-22 Cut3.Flag<sub>5</sub>::HphMX6 Cka1.HA<sub>3</sub>::KanMX6 nrc1Δ::NatMX6</i>                         | Figure 4                 | This work |
| KLP706 |              | <i>h<sup>-</sup> ade6-M210 ura4-D18 leu1-32 his3-D1 Cka1.HA<sub>3</sub>::KanMX6</i>                                           | Figures 4, 5, S3, S5-6   | This work |
| KLP694 |              | <i>h<sup>?</sup> cdc25-22 cut3.Flag<sub>5</sub>::HphMX6 Nrc1.HA<sub>3</sub>::KanMX6</i>                                       | Figures 4, 6, S3-4, S6-7 | This work |
| KLP689 |              | <i>h<sup>-</sup> ade6-M210 ura4-D18 leu1-32 his3-D1 Nrc1.HA<sub>3</sub>::KanMX6</i>                                           | Figure S2                | This work |
| KLP813 |              | <i>h<sup>-</sup> ade6-M210 ura4-D18 leu1-32 his3-D1 NatMX6-Fba1<sub>p</sub>-Nrc1.HA<sub>3</sub>::KanMX6</i>                   | Figure S2                | This work |
| KLP814 |              | <i>h<sup>-</sup> ade6-M210 ura4-D18 leu1-32 his3-D1 NatMX6-Adh1<sub>p</sub>-Nrc1.HA<sub>3</sub>::KanMX6</i>                   | Figure S2                | This work |
| KLP816 |              | <i>h<sup>-</sup> ade6-M210 ura4-D18 leu1-32 his3-D1 NatMX6-Lys4<sub>p</sub>-Nrc1.HA<sub>3</sub>::KanMX6</i>                   | Figure S2                | This work |
| KLP817 |              | <i>h<sup>-</sup> ade6-M210 ura4-D18 leu1-32 his3-D1 NatMX6-Ade4<sub>p</sub>-Nrc1.HA<sub>3</sub>::KanMX6</i>                   | Figure S2                | This work |
| KLP828 |              | <i>h<sup>?</sup> ade6-M2XX ura4-D18 leu1-32 his3-D1 cut3-477::NatMX6 NatMX6-Lys4<sub>p</sub>-Nrc1.HA<sub>3</sub>::KanMX6</i>  | Figure S2                | This work |
| KLP830 |              | <i>h<sup>?</sup> ade6-M2XX ura4-D18 leu1-32 his3-D1 cut3-477::NatMX6 NatMX6-Ade4<sub>p</sub>-Nrc1.HA<sub>3</sub>::KanMX6</i>  | Figure S2                | This work |
| KLP829 |              | <i>h<sup>?</sup> ade6-M2XX ura4-D18 leu1-32 his3-D1 cut14-208::NatMX6 NatMX6-Lys4<sub>p</sub>-Nrc1.HA<sub>3</sub>::KanMX6</i> | Figure S2                | This work |
| KLP831 |              | <i>h<sup>?</sup> ade6-M2XX ura4-D18 leu1-32 his3-D1 cut14-208::NatMX6</i>                                                     | Figure S2                | This work |

| Name   | Alt. name | Genotype                                                                       | Used    | Source    |
|--------|-----------|--------------------------------------------------------------------------------|---------|-----------|
|        |           | <i>NatMX6-Ade4<sub>p</sub>-Nrc1.HA<sub>3</sub>::KanMX6</i>                     |         |           |
| KLP22  |           | <i>h<sup>+</sup> ade6-M216 ura4-D18 leu1-32 his3-D1 Mis16.CTAP(2X)::KanMX6</i> | Table 1 | This work |
| KLP19  |           | <i>h<sup>+</sup> ade6-M216 ura4-D18 leu1-32 his3-D1 Hat1.CTAP(2X)::KanMX6</i>  | Table 1 | This work |
| KLP738 |           | <i>h<sup>+</sup> ade6-M216 ura4-D18 leu1-32 his3-D1 Mis18.CTAP(2X)::KanMX6</i> | Table 1 | This work |
| KLP219 |           | <i>h<sup>+</sup> ade6-M216 ura4-D18 leu1-32 his3-D1 Nrc1.CTAP(2X)::KanMX6</i>  | Table 1 | This work |

## (C) Oligonucleotides

| Name             | Sequence                      | Used                           |
|------------------|-------------------------------|--------------------------------|
| C1 (cnt1)-For    | 5'-tcgatgaaagaaaagcatttga-3'  | Figure S1                      |
| C1 (cnt1)-Rev    | 5'-gcaaatggccagagatttca-3'    |                                |
| C3.5 (cnt1)-For  | 5'-cggcggcggtataaactaag-3'    | Figures 2, 3, 4, 6 & S1        |
| C3.5 (cnt1)-Rev  | 5'-tactccatggcgcttccttc-3'    |                                |
| C3.5' (cnt1)-For | 5'-ccgttgcaactacatcagc-3'     | Figures 4 & S4                 |
| C3.5' (cnt1)-Rev | 5'-cgaaagatggcaattgctt-3'     |                                |
| C9 (cnt1)-For    | 5'-gaacaaaatagtaagcgttagt-3'  | Figure S1                      |
| C9 (cnt1)-Rev    | 5'-ctgcttgctctttcgttcc-3'     |                                |
| C4 (cnt1)-For    | 5'-ccagaatttccagacaatcg-3'    | Figure S1                      |
| C4 (cnt1)-Rev    | 5'-tcggttaatgggaaaatacaa-3'   |                                |
| C5 (cnt1)-For    | 5'-cacctctggagttctttgga-3'    | Figure S1                      |
| C5 (cnt1)-Rev    | 5'-atgcagggttatcgacaat-3'     |                                |
| I1 (imr1)-For    | 5'-ggcaatgtcacaaaagttcaa-3'   | Figure S1                      |
| I1 (imr1)-Rev    | 5'-tgaataacaatgctgtagcc-3'    |                                |
| I2 (imr1)-For    | 5'-tcagtaatcacatccgatgaaca-3' | Figure S1                      |
| I2 (imr1)-Rev    | 5'-tttcgatggacaccactctt-3'    |                                |
| I3 (imr3)-For    | 5'-cgaatatcgtgaaatttgcttg-3'  | Figure S1                      |
| I3 (imr3)-Rev    | 5'-tgaaggctgtgatttggtg-3'     |                                |
| I4 (imr1)-For    | 5'-ttttcgcctcatattcgttga-3'   | Figure S1                      |
| I4 (imr1)-Rev    | 5'-tcccagtaaatacaggtttgga-3'  |                                |
| O2 (otr1)-For    | 5'-tcatgaatctttccaagca-3'     | Figures 1 & S1                 |
| O2 (otr1)-Rev    | 5'-gcaccgttttccaaatgtc-3'     |                                |
| GFR (chr2)-For   | 5'-gcatcgttttcgcacaata-3'     | Figures 2, 3, 4, 6, 7, S1 & S4 |
| GFR (chr2)-Rev   | 5'-catgcatggcattttgta-3'      |                                |
| A1 (chr1)-For    | 5'-tctgatgccattggtttga-3'     | Figure S4                      |
| A1 (chr1)-Rev    | 5'-caaaacagcctcctaacttca-3'   |                                |
| B2 (chr1)-For    | 5'-accgcaccaatgtttctttatt-3'  | Figure S4                      |
| B2 (chr1)-Rev    | 5'-tgtcgtgagatccctacta-3'     |                                |
| C1 (chr1)-For    | 5'-ggcccaaggtgtgacatta-3'     | Figure S4                      |
| C1 (chr1)-Rev    | 5'-ggcccatggcaaagtaagta-3'    |                                |

|               |                               |                   |
|---------------|-------------------------------|-------------------|
| D1 (chr1)-For | 5'-accaattgtcctactgagcaaa-3'  | Figure S4         |
| D1 (chr1)-Rev | 5'-ttgtgtgcgtccaactaactaa-3'  |                   |
| D2 (chr1)-For | 5'-ttgcaacaagtgcgtcaat-3'     | Figure S4         |
| D2 (chr1)-Rev | 5'-gatgctagtgcattggagcaa-3'   |                   |
| E1 (chr2)-For | 5'-tagcgagaatagctttagcatgg-3' | Figure S4         |
| E1 (chr2)-Rev | 5'-cgataggggaatacattaccaca-3' |                   |
| G1 (chr2)-For | 5'-tttggtaaacaatcgatca-3'     | Figures 4, 7 & S4 |
| G1 (chr2)-Rev | 5'-ttaattgtgtggcgcttgac-3'    |                   |
| H1 (chr3)-For | 5'-ttgttttgccaaatggtttat-3'   | Figures 4, 7 & S4 |
| H1 (chr3)-Rec | 5'-aaacaagttcaatgagcgaaaa-3'  |                   |

---

## SUPPLEMENTARY FIGURES

**Figure S1 - Hat1-Mis16-dependent centromeric H3ac and H4ac levels at the core-centromere anti-correlate with condensin through mitosis** (related to **Figures 1 & 2**). **(A)** *hat1Δ / nrc1Δ* show a negligible additive effect in their individual rescue of *cut3-477*. Strains were isolated by crossing and tetrad dissection, spotted as 10-fold serial dilutions onto non-selective YES plates, and incubated as indicated. WT, wild type. **(B)** Cell-cycle synchronization by *cdc25-22*. Populations were arrested at the G<sub>2</sub>/M boundary by incubation at a non-permissive temperature for *cdc25-22* before synchronized release. Aliquots were then collected at 25-minute intervals for ChIP or cell-septation analyses (Kim et al., 2009). **(C)** Schematic depicts the fission yeast chromosome I centromere, including the core (*cnt*, ~ 4kb), inner (*imr*, ~ 8kb) and outer (*otr*, ~ 18kb) repeats, and the relative location of tRNAs (black bars) and various ChIP primer pairs (*O2 - C1*; see **Table S3**). The core and innermost repeats are ~ 90% cenH3 (*Sp Cnp1*), with the outermost repeats heterochromatic (H3-K9me2/3) (Kim et al., 2009; Pidoux et al., 2009; Williams et al., 2009). **(D)** Condensin enrichment across the metaphase centromere (see also **Figures 6B & S3**). Cells were synchronized by *cdc25-22* and ChIP used to monitor condensin (Cut3.HA<sub>3</sub>) at G<sub>2</sub>/M (T<sub>0</sub>) and metaphase (T<sub>75</sub>). In each duplex PCR the upper band is the test region (see panel C), lower band (GFR; Gene Free Region) is a condensin-free location as a background control (Kim et al., 2009). **(E-I)** Centromeric H3ac and H4ac are mitotically regulated in a Hat1-dependent manner to temporally anti-correlate with condensin. Cells were *cdc25-22* synchronized and ChIP used to monitor condensin and the indicated histones / modifications thereof at the chromosome I centromere core or outermost repeats (*C3.5* or *O2*; see panel C) at times indicated. The septation index (SI; peak shaded) and ChIP profiles of Cut3, H3-S10phos, H3-K4me3, H3-K9me2, H3 and histone variant CenH3 (*Cnp1*) confirmed synchronous progression and equivalent antibody access at each time point (Chen et al., 2008;

Kim et al., 2009). Panels **E / F** (related to **Figure 2C**), **G, H** and **I** (related to **Figure 2D**) are derived from different synchronized populations. **(J)** Mis16.HA<sub>3</sub> binding at the centromere parallels mitotically regulated H3-K9ac (related to **Figure 2F**). Note delayed mitotic progression in Mis16.HA<sub>3</sub> relative to WT cells (similar to *hat1Δ* in panel **H**). **(K)** Mis16.HA<sub>3</sub> (see **Figure 2G**) and *ckb1Δ* (see **Figure 4**) repair the anaphase chromosome segregation defects of *cut3-477*. Replicate cultures were shifted from 25°C to 34°C (non-permissive for *cut3-477*) for three hours, fixed, and the percentage (mean ± s.d.) of late anaphase cells with chromosome segregation defects determined.

**Figure S2 - Analyses of Nrc1** (related to **Figures 2 & 3**). **(A-C)** Cells show a dose-dependent response to Nrc1 levels (related to **Figure 2**). **(A)** Nrc1 protein levels were modulated by ‘knocking-in’ alternate promoters of predicted expression outputs to Nrc1.HA<sub>3</sub>: *fba1<sub>pr</sub>* (~ 256 mRNAs/hr) > *lys4<sub>pr</sub>* (~ 64 mRNAs/hr) > *ade4<sub>pr</sub>* (~ 32 mRNAs/hr) (Hiraoka et al., 2009) and the resulting Nrc1.HA<sub>3</sub> expression determined by immunoblotting. Nrc1.HA<sub>3</sub> runs at ~ 90 kD (\*); the cross-reacting lower kD bands are likely break-down products since not seen in the untagged strain. Tbp1 is a loading control. **(B)** Nrc1 overexpression (*fba1<sub>pr</sub>* or *adh1<sub>pr</sub>* driven) led to slow-growth and compromised cell health (note red staining of colonies due to accumulation of the vital stain phloxin; *Sigma*). These cells also exhibited defects in mating / sporulation / germination (not shown). Strains were spotted as 10-fold serial dilutions onto YES/phloxin plates and incubated as indicated. **(C)** Nrc1 showed dose-dependent interactions with mutant *condensin*: overexpression (*lys4<sub>pr</sub>*) is synthetic and reduced expression (*ade4<sub>pr</sub>*) suppressive. Strains were spotted as 10-fold serial dilutions onto YES plates and incubated as indicated. **(D)** *nrc1Δ* showed negative genetic interactions with mutants related to chromosome segregation (*DASH* complex), centromere function, histone acetylation or histone variant H2A.Z (Pht1)

function. The latter group includes mutants that compromise H2A.Z deposition (SWR-Complex) or acetylation (*pht1-NΔ*, *4KR*, or *4KQ*): of note many of these alleles also suppress mutant *condensin* (Kim et al., 2009) (**Figure 1B**). The calculation of genetic scores is as previously (Roguev et al., 2008; Ryan et al., 2012). **(E)** Specific binding of Nrc1-BD1 to the acetylated histone H4 N-terminus. Purified recombinants (Nrc1 residues S199-G526: WT, BD1\*, BD2\* or BD1\*/BD2\*) were used to probe histone-peptide arrays in duplicate, and consistent areas of relative enrichment identified from heat maps of the normalized mean intensity (set to a maximal value of one in each array: see **Experimental Procedures** (Fuchs et al., 2010; Rothbart et al., 2012)). Panel is an extension of **Figure 3E**. Of note, all hyperacetylated H4 peptides ( $\geq 4$  of K5ac, K8ac, K12ac, K16ac and K20ac) on the array were enriched for WT Nrc1-binding. Specific peptide #'s are from (Rothbart et al., 2012). **(F)** Reproducibility of the approach. Scatter-plot compares the binding of *nrc1-BD2\** in two independent analyses (12 peptide-spot repeats per array; pairwise correlation co-efficient 0.64). **(G)** Nrc1 shows limited selectivity for the specific acetylated residues on di-acetylated histone H4 (average and SEM from 24 individual spots per peptide over two independent analyses).

**Figure S3 - Comparison of NCT and condensin localization** (related to **Figures 4 & 6**). ChIP-seq data was loaded into *Genplay* (Lajugie and Bouhassira, 2011) as individual tracks (50 bp windows; normalized and INPUT subtracted) relative to the annotated *Sp* genome (Sanger Center release *pombe090511*): the online version of this paper links to a *Genplay* project to dynamically visualize each track. As noted, specific ChIP-seq libraries were prepared from asynchronous (i.e. primarily G<sub>2</sub>) or cell-cycle synchronized cells (see **Figure 6A**). All sample data have been deposited in NCBI's Gene Expression Omnibus (Edgar et al., 2002) and are accessible through GEO series accession number GSE53955.

**(A-D)** Centromeric distribution. **(A)** Upper schematics depict the structure of all three fission yeast centromeres (window size (in bp) around centerpoint as indicated). Lower annotation tracks depict the genomic elements (e.g. genes, tRNAs and miscRNAs) at each location. **(B)** TBP peaks identify the tRNAs that demark the inner / outer centromere and peri-centromeric boundary; H3-K9me2 enrichment identifies heterochromatin (i.e. the outer repeats of each centromere) (Partridge, 2008; Wood et al., 2002). **(C)** Nrc1.HA<sub>3</sub> is mitotically regulated to nadir at metaphase (T<sub>75</sub>). Of note the Nrc1 peaks in synchronized are less defined than in asynchronous populations, suggesting that delocalization of the factor may begin at G<sub>2</sub>/M. **(D)** Condensin (Cut3.FLAG<sub>5</sub>) is most highly enriched over the core centromere at metaphase (T<sub>75</sub>) (Nakazawa et al., 2008): compare the 'Peak count' scale for each track to that along the chromosome arms in **Figure S5**.

**(E-I)** Distribution at representative regions along the chromosome arms. The red-boxed regions were extracted for **Figures 4 - 6** but are aligned here to facilitate comparison. Note the reduced 'Peak count' scale for each track relative to at the centromere (**B-D**). **(E)** Each 10 kb window is named for the centered genomic feature (annotation track; red transcripts go to right): this does not mean that the factor under test is definitively regulated by the expression (or otherwise) of that feature. *qPCR primers* indicates the location of directly tested regions (e.g. **Figure S5**). **(F)** The strong similarity between regions enriched for Nrc1, Cka1 and Taf7 (elements of the NCT complex); **(G)** Nrc1 delocalization through mitosis, with the nadir at metaphase (~ T<sub>75</sub>); **(H)** Condensin occupies many of the same locations as the NCT, but temporally anti-correlates with Nrc1. **(I)** TBP, H3-K4me3 and H3-K36me3 identify the promoters, 5' ends and ORFs of transcriptionally active genes.

**Figure S4 - qPCR analysis of *ChIP-seq* peaks** (related to **Figures 4F & 6F**). qPCR-ChIP (rather than duplex PCR-ChIP as in **Figures 2C, 2D, 2F, 3C & 4C**) was used to test representative *ChIP-*

*seq* predictions. All samples were prepared from synchronized populations (**Figure 6A**). (**A-B**) qPCR confirmed nine sites of Nrc1 / condensin enrichment: eight on the chromosome arms (*A-H*: **Figure S3E**) and at the core centromere (*c3.5'*: **Figure S3A**). Data (mean + SD) is normalized to *GFR* (set to 1). (**C-D**) The association of Cka1 with the chromosome arms (*G1, H1, A1* and *B2*; see also **Figure 6F**) and core centromere (*c3.5'*; see also **Figure 4C**) is mitotically regulated. Data (mean + SD) is normalized to *GFR-T<sub>0</sub>* (set to 1).

**Figure S5 - ChIP-seq peak behavior supports a TFIID-independent role for Taf7** (related to **Figures 4E & 5G** and **Table S2**). (**A**) ChIP-seq data was loaded into *Genplay* (Lajugie and Bouhassira, 2011) as individual tracks (50bp windows; normalized and INPUT subtracted) relative to the annotated *S. pombe* genome (Sanger Center release *pombe090511*). Peaks in each track were then automatically identified / quantified by optimized parameters: Regions of 10 successive Windows; Gap permitted, 1 window; Threshold Island Score (IS), 10; Minimum Island Length, 4 windows (<sup>†</sup> 6 windows for H3-K36me3). Data was then exported to *Excel*, TEL3L/R and CEN1-3 removed (see **Experimental Procedures** and **Table S2**), and the size-distributions of the remaining peak widths graphed in *Prism*. ChIP-seq samples were from asynchronous populations (Asyn) with the exception of Cut3 (**H / H'**; T<sub>75</sub> from **Figure 6F**). (**B**) H3-K4me3 is highly enriched over a ~ 780 nt region promoter-proximal to active RNAPII genes (see **Figure S3I**). \* Many H3-K4me3 'peaks' > 1 kb are actually a merge (during automated calling) of distinct peaks from two adjacent divergently transcribed genes. *Excl* indicates the number of excluded peaks > 2000 nt width. (**C**) H3-K36me3 is enriched through the body of active RNAPII genes (see **Figure S3I**); hence the wide range of peak widths. (**D / D'**) TBP peaks: All (IS >10) / Major (IS >100). (**E / E'**) Taf7 peaks. All (IS >10) / Major (IS >100). (**F / F'**) Nrc1 peaks. All (IS >10) / Major (IS >100). (**G / G'**) Cka1 peaks. All (IS >10) / Major (IS >100). (**H / H'**) Cut3 peaks. All (IS >10) / Major (<sup>#</sup> IS >50).



**Figure S6 - NCT and condensin localization at the histone loci** (related to **Figure 5G**). *ChIP-seq* data (from asynchronous or cell-cycle synchronized cells as noted) was loaded into *Genplay* (Lajugie and Bouhassira, 2011) as individual tracks (50bp windows; normalized and INPUT subtracted) relative to the annotated *S. pombe* genome (Sanger Center release *pombe090511*). **(A)** Each 10 kb test window is named for the centered histone locus (upper schematic), all of which are poorly transcribed outside of S-phase (Marguerat et al., 2006; Oliva et al., 2005; Peng et al., 2006). **(B-E)** The relative enrichment of various factors or histone modifications by chromosomal position. **(B)** TBP and Taf7 are most enriched at the intergenic promoter regions, while Nrc1 and Cka1 bind across each histone gene (note unidirectional spread at the unpaired *hta2<sup>+</sup>* locus). **(C)** Note the nadir of Nrc1 binding at metaphase ( $T_{75}$ ). **(D)** Condensin is highly enriched at the 3' end of each histone gene. Of note maximal Cut3 recruitment at each locus is delayed relative to most other locations (i.e.  $T_{100} > T_{75}$ : compare to **Figure S3**). **(E)** TBP, H3-K4me3 and H3-K36me3 identify the promoters, 5' ends and ORFs of transcriptionally active genes.

**Figure S7 - Condensin shows a strong preference for the structural RNA genes** (related to **Figure 6**). **(A-C)** Data is presented as the percentage of Cut3 peaks (major or all: see **Table S2**) per feature, and percentage coverage of each feature. For panel **C** the *Fisher's exact test* (by *R*) was used to estimate the probability of the observed coverage of structural RNAs: *p-value* for both datasets  $< 2.2 \times 10^{-16}$  (the smallest value *R* will provide).

**SUPPLEMENTAL REFERENCES**

- Caterino, T.L., and Hayes, J.L. (2007). Chromatin structure depends on what's in the nucleosome pocket. *Nat Struct Mol Biol* *14*, 1056-1058.
- Chen, E.S., Zhang, K., Nicolas, E., Cam, H.P., Zofall, M., and Grewal, S.I. (2008). Cell cycle control of centromeric repeat transcription and heterochromatin assembly. *Nature* *451*, 734-737.
- Edgar, R., Domrachev, M., and Lash, A.E. (2002). Gene Expression Omnibus: NCBI gene expression and hybridization array data repository. *Nucl Acids Res* *30*, 207-210.
- Fuchs, S.M., Krajewski, K., Baker, R.W., Miller, V.L., and Strahl, B.D. (2010). Influence of combinatorial histone modifications on antibody and effector protein recognition. *Curr Biol* *21*, 53-58.
- Hiraoka, Y., Kawamata, K., Haraguchi, T., and Chikashige, Y. (2009). Codon usage bias is correlated with gene expression levels in the fission yeast *Schizosaccharomyces pombe*. *Genes Cells* *14*, 499-509.
- Huang, Y., Hamada, M., and Maraia, R.J. (2000). Isolation and cloning of four subunits of a fission yeast TFIIC complex that includes an ortholog of the human regulatory protein TFIICb. *J Biol Chem* *275*, 31480-31487.
- Kim, H.-S., Vanoosthuyse, V., Fillingham, J., Roguev, A., Watt, S., Kislinger, T., Treyer, A., Carpenter, L.R., Bennett, C.S., Emili, A., *et al.* (2009). An acetylated form of histone H2A.Z regulates chromosome architecture in *Schizosaccharomyces pombe*. *Nat Struct Mol Biol* *16*, 1286-1293.
- Lajugie, J., and Bouhassira, E.E. (2011). GenPlay, a multipurpose genome analyzer and browser. *Bioinformatics* *27*, 1889-1893.
- Marguerat, S., Jensen, T.S., de Lichtenberg, U., Wilhelm, B.T., Jensen, L.J., and Bähler, J. (2006). The more the merrier: comparative analysis of microarray studies on cell cycle-regulated genes in fission yeast. *Yeast* *23*, 261-277.
- Matsuyama, A., Arai, R., Yashiroda, Y., Shirai, A., Kamata, A., Sekido, S., Kobayashi, Y., Hashimoto, A., Hamamoto, M., Hiraoka, Y., *et al.* (2006). ORFeome cloning and global analysis of protein localization in the fission yeast *Schizosaccharomyces pombe*. *Nat Biotechnol* *24*, 841-847.
- Mitsuzawa, H., Seino, H., Yamao, F., and Ishihama, A. (2001). Two WD repeat-containing TATA-binding protein-associated factors in fission yeast that suppress defects in the anaphase-promoting complex. *J Biol Chem* *276*, 17117-17124.
- Nakazawa, N., Nakamura, T.M., Kokubu, A., Ebe, M., Nagao, K., and Yanagida, M. (2008). Dissection of the essential steps for condensin accumulation at kinetochores and rDNAs during fission yeast mitosis. *J Cell Biol* *180*, 1115-1131.
- Oliva, O., Rosebrock, A., Ferrezuelo, F., Pyne, S., Chen, H.T., Skiena, S., Futcher, B., and Leatherwood, J. (2005). The cell-cycle regulated genes of *Schizosaccharomyces pombe*. *PLOS Biol* *3*, 1239-1260.
- Partridge, J.F. (2008). Centromeric chromatin in fission yeast. *Front Biosci* *13*, 3896-3905.
- Peng, X., Karuturi, R.K., Miller, L.D., Lin, K., Jia, Y., Kondu, P., Wang, L., Wong, L.S., Liu, E.T., Balasubramanian, M.K., and Liu, J. (2006). Identification of cell cycle-regulated genes in fission yeast. *Mol Biol Cell* *16*, 1026-1042.
- Pidoux, A.L., Choi, E.S., Abbott, J.K., Liu, X., Kagansky, A., Castillo, A.G., Hamilton, G.L., Richardson, W., Rappsilber, J., He, X., and Allshire, R.C. (2009). Fission yeast Scm3: A CENP-A receptor required for integrity of subkinetochore chromatin. *Mol Cell* *33*, 299-311.

- Roguev, A., Bandyopadhyay, S., Zofall, M., Zhang, K., Fischer, T., Collins, S.R., Qu, H., Shales, M., Park, H.O., Hayles, J., *et al.* (2008). Conservation and rewiring of functional modules revealed by an epistasis map (E-MAP) in fission yeast. *Science* 322, 405-410.
- Rothbart, S.B., Lin, S., Britton, L.-M., Krajewski, K., Keogh, M.-C., Garcia, B.A., and Strahl, B.D. (2012). Poly-acetylated chromatin signatures are preferred epitopes for site-specific histone H4 acetyl antibodies. *Sci Rep* 2, 489.
- Ryan, C.J., Roguev, A., Patrick, K., Xu, J., Jahari, H., Tong, Z., Beltrao, P., Shales, M., Qu, H., Collins, S.R., *et al.* (2012). Hierarchical modularity and the evolution of genetic interactomes across species. *Mol Cell* 46, 691-704.
- Silva, A.C., Xu, X., Kim, H.-S., Fillingham, J., Kislinger, T., Mennella, T.A., and Keogh, M.-C. (2012). The Replication-Independent Chaperones HIR, Asf1 and Rtt106 co-operate to maintain promoter fidelity *J Biol Chem* 287, 1709-1718.
- Williams, J.S., Hayashi, T., Yanagida, M., and Russell, P. (2009). Fission yeast Scm3 mediates stable assembly of Cnp1/CENP-A into centromeric heterochromatin. *Mol Cell* 33, 287-298.
- Wood, V., Gwilliam, R., Rajandream, M.A., Lyne, M., Lyne, R., Stewart, A., Sgouros, J., Peat, N., Hayles, J., Baker, S., *et al.* (2002). The genome sequence of *Schizosaccharomyces pombe*. *Nature* 415, 871-880.
- Woods, A., Sherwin, T., Sasse, R., MacRae, T.H., Baines, A.J., and Gull, K. (1989). Definition of individual components within the cytoskeleton of *Trypanosoma brucei* by a library of monoclonal antibodies. *J Cell Sci* 93, 491-500.
